# Supplementary material
Source: publisher figshare collection journal article supplement (https://sage.figshare.com/ndownloader/files/24127813)
Supplement: Supplementary file 1 [file 24127813]

# Appendix

## Effect of co-payment on dental visits: A regression discontinuity analysis

Upul Cooray<sup>1,2</sup>, Jun Aida<sup>1</sup>, Richard G Watt<sup>2</sup>, Georgios Tsakos<sup>2</sup>, Anja Heilmann<sup>2</sup>  
Hiroataka Kato<sup>3</sup>, Sakura Kiuchi<sup>1</sup>, Katsunori Kondo<sup>4,5</sup>, Ken Osaka<sup>1</sup>

<sup>1</sup>Department of International and Community Oral Health, Tohoku University Graduate School of Dentistry, Sendai, Japan

<sup>2</sup>Department of Epidemiology and Public Health, University College London, London, United Kingdom

<sup>3</sup>Graduate School of Business Administration, Keio University, Japan

<sup>4</sup>Center for Preventive Medical Sciences, Chiba University, Chiba, Japan

<sup>5</sup>Center for Gerontology and Social Science, National Center for Geriatrics and Gerontology, Obu, Japan

Appendix Table 1. Comparing characteristics of missing informations related to outcome variables

| Characteristics                           | Treatment visits during past 12 months |       |                      |       |                    |       | Check-up visits during past 12 months |       |                      |       |                    |       |
|-------------------------------------------|----------------------------------------|-------|----------------------|-------|--------------------|-------|---------------------------------------|-------|----------------------|-------|--------------------|-------|
|                                           | Non missing<br>(n = 7,374)             |       | Missing<br>(n = 286) |       | Total<br>(N=7,660) |       | Non missing<br>(n = 7,235)            |       | Missing<br>(n = 425) |       | Total<br>(N=7,660) |       |
|                                           | n                                      | Col%  | n                    | Col%  | N                  | Col%  | n                                     | Col%  | n                    | Col%  | N                  | Col%  |
| <b>Sex</b>                                |                                        |       |                      |       |                    |       |                                       |       |                      |       |                    |       |
| Male                                      | 3,495                                  | 47.4% | 112                  | 39.2% | 3,607              | 47.1% | 3,443                                 | 47.6% | 164                  | 38.6% | 3,607              | 47.1% |
| Female                                    | 3,879                                  | 52.6% | 174                  | 60.8% | 4,053              | 52.9% | 3,792                                 | 52.4% | 261                  | 61.4% | 4,053              | 52.9% |
| <b>Household Income (million yen/ yr)</b> |                                        |       |                      |       |                    |       |                                       |       |                      |       |                    |       |
| <2                                        | 2,852                                  | 38.7% | 100                  | 35.0% | 2,952              | 38.5% | 2,800                                 | 38.7% | 152                  | 35.8% | 2,952              | 38.5% |
| >=2 to <3                                 | 1,520                                  | 20.6% | 44                   | 15.4% | 1,564              | 20.4% | 1,508                                 | 20.8% | 56                   | 13.2% | 1,564              | 20.4% |
| >=3 to <4                                 | 1,038                                  | 14.1% | 22                   | 7.7%  | 1,060              | 13.8% | 1,028                                 | 14.2% | 32                   | 7.5%  | 1,060              | 13.8% |
| >=4                                       | 701                                    | 9.5%  | 27                   | 9.4%  | 728                | 9.5%  | 693                                   | 9.6%  | 35                   | 8.2%  | 728                | 9.5%  |
| Missing                                   | 1,263                                  | 17.1% | 93                   | 32.5% | 1,356              | 17.7% | 1,206                                 | 16.7% | 150                  | 35.3% | 1,356              | 17.7% |
| <b>Number of remaining teeth</b>          |                                        |       |                      |       |                    |       |                                       |       |                      |       |                    |       |
| No teeth                                  | 338                                    | 4.6%  | 26                   | 9.1%  | 364                | 4.8%  | 332                                   | 4.6%  | 32                   | 7.5%  | 364                | 4.8%  |
| 1 to 9                                    | 938                                    | 12.7% | 43                   | 15.0% | 981                | 12.8% | 909                                   | 12.6% | 72                   | 16.9% | 981                | 12.8% |
| 10 to 19                                  | 1,592                                  | 21.6% | 47                   | 16.4% | 1,639              | 21.4% | 1,544                                 | 21.3% | 95                   | 22.4% | 1,639              | 21.4% |
| >= 20                                     | 4,386                                  | 59.5% | 157                  | 54.9% | 4,543              | 59.3% | 4,334                                 | 59.9% | 209                  | 49.2% | 4,543              | 59.3% |
| Missing                                   | 120                                    | 1.6%  | 13                   | 4.5%  | 133                | 1.7%  | 116                                   | 1.6%  | 17                   | 4.0%  | 133                | 1.7%  |

Appendix Table 2. Comparing imputed covariates before and after imputation

| Variable                         | Before Imputation |       | After Imputation |       |
|----------------------------------|-------------------|-------|------------------|-------|
|                                  | n                 | Col%  | n                | Col%  |
| <b>Household Income</b>          |                   |       |                  |       |
| <2                               | 2,776             | 46.4% | 3,353            | 46.8% |
| >=2 to <3                        | 1,496             | 25.0% | 1,784            | 24.9% |
| >=3 to <4                        | 1,020             | 17.1% | 1,214            | 17.0% |
| >=4                              | 687               | 11.5% | 810              | 11.3% |
| Total                            | 5,979             |       | 7,161            |       |
| <b>Number of remaining teeth</b> |                   |       |                  |       |
| No teeth                         | 329               | 4.7%  | 334              | 4.7%  |
| 1 to 9                           | 903               | 12.8% | 918              | 12.8% |
| 10 to 19                         | 1,536             | 21.8% | 1,562            | 21.8% |
| >= 20                            | 4,278             | 60.7% | 4,347            | 60.7% |
| Total                            | 7,046             |       | 7,161            |       |

Appendix Table 3: Comparison of overall f statistics for different functional forms of Z (outcome variable= check-up visits)

| Model type        | Linear                 |                       | Linear interaction   |                        | Quadratic              |                        | Quadratic interaction  |                        |
|-------------------|------------------------|-----------------------|----------------------|------------------------|------------------------|------------------------|------------------------|------------------------|
|                   | Unweighted             | Weighted              | Unweighted           | Weighted               | Unweighted             | Weighted               | Unweighted             | Weighted               |
| T                 | 0.94<br>[0.73,1.21]    | 0.95<br>[0.77,1.16]   | 0.96<br>[0.80,1.16]  | 1.16***<br>[1.15,1.18] | 1.23*<br>[1.02,1.47]   | 1.21***<br>[1.19,1.23] | 1.49***<br>[1.44,1.54] | 1.52***<br>[1.47,1.56] |
| Z                 | 1.11***<br>[1.04,1.17] | 1.11**<br>[1.03,1.18] | 1.07<br>[1.00,1.15]  | 0.93***<br>[0.93,0.94] | 0.78*<br>[0.64,0.96]   | 0.88***<br>[0.86,0.89] | 0.64***<br>[0.62,0.66] | 0.63***<br>[0.61,0.65] |
| T#Z               |                        |                       | 1.07*<br>[1.00,1.15] | 1.23***<br>[1.21,1.26] | 1.73***<br>[1.27,2.34] | 1.37***<br>[1.33,1.41] | 1.92***<br>[1.85,1.99] | 1.95***<br>[1.88,2.01] |
| Z <sup>2</sup>    |                        |                       |                      |                        | 0.93**<br>[0.88,0.97]  | 0.98***<br>[0.97,0.98] | 0.88***<br>[0.87,0.89] | 0.88***<br>[0.87,0.89] |
| T#Z <sup>2</sup>  |                        |                       |                      |                        |                        |                        | 1.09***<br>[1.08,1.11] | 1.10***<br>[1.09,1.11] |
| <b>F_mi value</b> | <b>105.81</b>          | <b>214.82</b>         | <b>397.73</b>        | <b>1285.88</b>         | <b>7454.75</b>         | <b>4795.42</b>         | <b>4670.16</b>         | <b>5928.08</b>         |
| <i>N</i>          | 7,161                  | 7,161                 | 7,161                | 7,161                  | 7,161                  | 7,161                  | 7,161                  | 7,161                  |

Exponentiated coefficients; 95% confidence intervals in brackets

\*  $p < 0.05$ , \*\*  $p < 0.01$ , \*\*\*  $p < 0.001$

# indicates interaction

Appendix Table 4: Comparison of overall f statistics for different functional forms of Z (outcome variable= treatment visits)

| Model type        | Linear                |                       | Linear interaction   |                        | Quadratic             |                        | Quadratic interaction  |                        |
|-------------------|-----------------------|-----------------------|----------------------|------------------------|-----------------------|------------------------|------------------------|------------------------|
|                   | Unweighted            | Weighted              | Unweighted           | Weighted               | Unweighted            | Weighted               | Unweighted             | Weighted               |
| T                 | 0.97<br>[0.79,1.19]   | 0.97<br>[0.83,1.13]   | 0.99<br>[0.87,1.13]  | 1.14***<br>[1.13,1.16] | 1.17*<br>[1.00,1.38]  | 1.15***<br>[1.13,1.17] | 1.36***<br>[1.33,1.40] | 1.38***<br>[1.34,1.42] |
| Z                 | 1.09**<br>[1.03,1.14] | 1.09**<br>[1.03,1.15] | 1.05<br>[1.00,1.11]  | 0.95***<br>[0.94,0.96] | 0.85<br>[0.71,1.01]   | 0.94***<br>[0.92,0.96] | 0.72***<br>[0.70,0.75] | 0.71***<br>[0.69,0.74] |
| T#Z               |                       |                       | 1.07*<br>[1.02,1.13] | 1.19***<br>[1.17,1.20] | 1.49**<br>[1.14,1.95] | 1.21***<br>[1.17,1.25] | 1.61***<br>[1.55,1.67] | 1.62***<br>[1.57,1.67] |
| Z <sup>2</sup>    |                       |                       |                      |                        | 0.95*<br>[0.91,0.99]  | 1.00<br>[0.99,1.00]    | 0.91***<br>[0.91,0.92] | 0.91***<br>[0.90,0.92] |
| T#Z <sup>2</sup>  |                       |                       |                      |                        |                       |                        | 1.08***<br>[1.07,1.09] | 1.08***<br>[1.07,1.09] |
| <b>F_mi value</b> | <b>181.55</b>         | <b>372.80</b>         | <b>843.35</b>        | <b>2054.15</b>         | <b>2489.94</b>        | <b>3251.61</b>         | <b>3349.30</b>         | <b>3955.23</b>         |
| <i>N</i>          | 7,161                 | 7,161                 | 7,161                | 7,161                  | 7,161                 | 7,161                  | 7,161                  | 7,161                  |

Exponentiated coefficients; 95% confidence intervals in brackets

\*  $p < 0.05$ , \*\*  $p < 0.01$ , \*\*\*  $p < 0.001$

# indicates interaction

Appendix Table 5. Results of complete case analysis (logistic regression models predicting dental visits during past 12 months): N= 5,895

| <i>Variables</i>                                     | Dental visits during past 12 months |                        |                        |                        |
|------------------------------------------------------|-------------------------------------|------------------------|------------------------|------------------------|
|                                                      | Treatment visits                    |                        | Check-up visits        |                        |
|                                                      | OR                                  |                        | OR                     |                        |
|                                                      | [95% CI]                            |                        | [95% CI]               |                        |
|                                                      | Unweighted                          | Weighted               | Unweighted             | Weighted               |
| RD estimate (co-efficient of T)                      | 1.24***<br>[1.20,1.28]              | 1.27***<br>[1.22,1.32] | 1.39***<br>[1.35,1.44] | 1.42***<br>[1.38,1.47] |
| Age                                                  | 0.83***<br>[0.80,0.86]              | 0.81***<br>[0.78,0.84] | 0.69***<br>[0.67,0.72] | 0.68***<br>[0.65,0.70] |
| Eligibility (T) # Age                                | 1.29***<br>[1.25,1.33]              | 1.31***<br>[1.26,1.35] | 1.72***<br>[1.67,1.78] | 1.75***<br>[1.70,1.81] |
| Age <sup>2</sup> (2 <sup>nd</sup> order polynomials) | 0.94***<br>[0.94,0.95]              | 0.94***<br>[0.93,0.95] | 0.90***<br>[0.89,0.91] | 0.90***<br>[0.89,0.90] |
| Eligibility (T) # Age <sup>2</sup>                   | 1.08***<br>[1.07,1.10]              | 1.10***<br>[1.08,1.11] | 1.11***<br>[1.10,1.12] | 1.11***<br>[1.10,1.12] |
| Sex                                                  |                                     |                        |                        |                        |
| Male                                                 | Reference                           | Reference              | Reference              | Reference              |
| Female                                               | 1.16**<br>[1.05,1.28]               | 1.23***<br>[1.10,1.37] | 1.43***<br>[1.29,1.58] | 1.53***<br>[1.31,1.78] |
| Household income ( yen/year)                         |                                     |                        |                        |                        |
| < 2 million                                          | Reference                           | Reference              | Reference              | Reference              |
| 2 to 3 million                                       | 1.18<br>[0.98,1.43]                 | 1.06<br>[0.89,1.26]    | 1.08<br>[0.90,1.28]    | 0.98<br>[0.84,1.15]    |
| 3 to 4 million                                       | 1.22*<br>[1.04,1.42]                | 1.15<br>[0.93,1.42]    | 1.12<br>[0.98,1.27]    | 1.06<br>[0.88,1.27]    |
| ≥ 4 million                                          | 1.20<br>[0.92,1.56]                 | 1.02<br>[0.86,1.20]    | 1.16*<br>[1.04,1.31]   | 1.08<br>[0.97,1.20]    |
| Number of remaining teeth                            |                                     |                        |                        |                        |
| No teeth                                             | Reference                           | Reference              | Reference              | Reference              |
| 1 to 9 teeth                                         | 3.53***<br>[2.69,4.64]              | 3.48***<br>[2.71,4.46] | 3.50***<br>[2.59,4.74] | 3.07***<br>[2.32,4.04] |
| 10 to 19 teeth                                       | 5.18***<br>[4.21,6.36]              | 4.84***<br>[4.01,5.83] | 5.07***<br>[3.57,7.22] | 4.45***<br>[3.12,6.35] |
| More than 20 teeth                                   | 4.86***<br>[4.29,5.50]              | 4.86***<br>[4.22,5.60] | 5.85***<br>[4.43,7.73] | 5.44***<br>[4.10,7.21] |
| N                                                    | 5895                                | 5895                   | 5895                   | 5895                   |

OR: Odds Ratio; CI: Confidence interval

Standard errors are clustered around values of age-centered variable (cluster VCE )

\*  $p < 0.05$ , \*\*  $p < 0.01$ , \*\*\*  $p < 0.001$

# indicates interaction
